# Supplementary material for: Quantitative Evaluation and Selection of Reference Genes for Quantitative RT-PCR in Mouse Acute Pancreatitis
Source: Hindawi journal article supplement (doi:10.1155/2016/8367063), 2016-01-01
Supplement: f1 [file 8367063.f1.pdf]

**Supplement Table 3 Reference genes evaluated in this study and their function.**

| Gene symbol  | Gene name                                                                                | Brief description                                                |
|--------------|------------------------------------------------------------------------------------------|------------------------------------------------------------------|
| ACTB         | Beta-actin                                                                               | Cytoskeletal structural protein                                  |
| GAPDH        | Glyceraldehyde-3-phosphate dehydrogenase                                                 | Enzyme involved in glycolysis                                    |
| 18s RNA      | 18s Ribosomal RNA                                                                        | Component of a ribosomal subunit                                 |
| B2M          | Beta-2 microglobulin                                                                     | Beta-chain of major histocompatibility complex class I molecules |
| RPL13A       | Ribosomal protein L13A                                                                   | Ingredient of the large 60s ribosomal subunit                    |
| EF1 $\alpha$ | Eukaryotic translational factor 1 alpha                                                  | Involved in translation elongation                               |
| UBC          | Ubiquitin C                                                                              | Protein degradation                                              |
| HPRT1        | Hypoxanthine phosphoribosyltransferase 1                                                 | Glycosyltransferase, purine synthesis in salvage pathway         |
| YWHAZ        | Tyrosine 3-monooxygenase/tryptophan 5-monooxygenase activation protein, zeta polypeptide | Phosphorylated signaling molecules                               |
